# Supplementary material
Source: PubMed Central journal article supplement (PMC5768556)
Supplement: mmc1.pdf [file mmc1.pdf]

**YMTHE, Volume 25**

## **Supplemental Information**

### **Guanidinylated Neomycin Conjugation Enhances**

### **Intranasal Enzyme Replacement in the Brain**

**Wenyong Tong, Chrissa A. Dwyer, Bryan E. Thacker, Charles A. Glass, Jillian R. Brown, Kristina Hamill, Kelley W. Moremen, Stéphane Sarrazin, Philip L.S.M. Gordts, Lara E. Dozier, Gentry N. Patrick, Yitzhak Tor, and Jeffrey D. Esko**

**Figure S1. GNeo structure and purification of GNeo-conjugated recombinant enzymes.** **A** Structure of *N*-hydroxysuccinimide activated ester of guanidinylated neomycin (GNeo-NHS).<sup>48</sup> **B-D** GNeo conjugated enzymes were purified by affinity chromatography on heparin-Sepharose. The elution positions of conjugated and unconjugated enzyme are shown. Unconjugated SGSH did not bind to column. Chromatograms show elution profile of **B** GNeo-AP-IDUA, **C** GNeo-IDUA and **D** GNeo-SGSH.

**Figure S2. GNeo-conjugation does not affect enzyme stability.** **A** AP-IDUA and GNeo-AP-IDUA were incubated at 45 °C for the indicated time and then assayed for enzyme activity. The values were scaled to samples that had not been heat-treated. **B** MPS I mice (*Idua*<sup>-/-</sup>) were treated intravenously with 5 mg/kg GNeo-IDUA. Plasma was collected at 2, 5, 10, 20, 40 and 60 minutes following treatment. IDUA enzyme activity was measured in the plasma of N = 3 mice.

**Figure S3. GNeo conjugation does not enhance nose-to-brain delivery of recombinant enzymes.** **A** *Idua*<sup>-/-</sup> mice (20-36 weeks) were treated intranasally with PBS, 1 mg/kg IDUA or 1 mg/kg GNeo-IDUA. **B** *Sgs*<sup>+/-</sup> mice (6-9 weeks old) were treated intranasally with 1 mg/kg Myc-His<sub>6</sub>-SGSH or 1 mg/kg GNeo- Myc-His<sub>6</sub>-SGSH. Animals were perfused with PBS and whole brains were collected 1 hr following treatment. The amount of IDUA mass was determined by measuring enzyme activity against a standard curve of enzyme activity vs. Aldurazyme<sup>®</sup> mass. The amount of Myc-His<sub>6</sub>-SGSH in brain extracts was measured by ELISA using known amounts of Myc-His<sub>6</sub>-SGSH to create a standard curve.

**Figure S4. Pharmacokinetic analysis of intranasally administered GNeo-conjugated sulfamidase.** *Sgsh*<sup>+/-</sup> mice (8-9 weeks old) were treated intranasally with 1 mg/kg GNeo-His<sub>6</sub>-SGSH and perfused with PBS at 0, 0.5, 1, 2, and 4 hrs following treatment. His<sub>6</sub>-SGSH enzyme was collected from whole brain extracts using Ni<sup>2+</sup> beads and enzyme activity was measured and normalized to a standard curve generated with known amounts of His<sub>6</sub>-SGSH. N = 3–5 mice per bar.

**Figure S5. GNeo-IDUA reduces GAG storage in the *Idua*<sup>-/-</sup> mouse brain.** *Idua*<sup>-/-</sup> mice were treated intranasally with 1 mg/kg IDUA or GNeo-IDUA every-other-day. Uronic acid levels were measured by carbazole assay in GAG preparations from whole brain lysate. **A** 14 d treatment, **B** 30 d treatment, **C** 60 d treatment.

**Figure S6. GNeo-SGSH reduces the accumulation of the MPS IIIA biomarker the brain.** *Sgsh*<sup>h/h</sup> mice were treated intranasally with 1 mg/kg SGSH or GNeo-SGSH every other day for 30 d. Non-reducing end biomarkers were measured in GAG preparations from whole brain homogenates.

**A**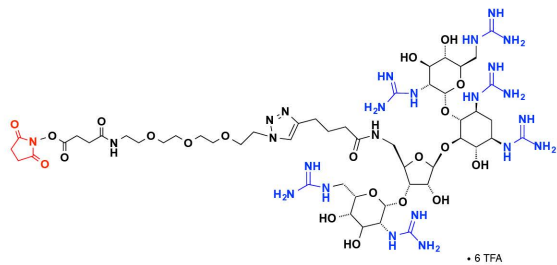**B**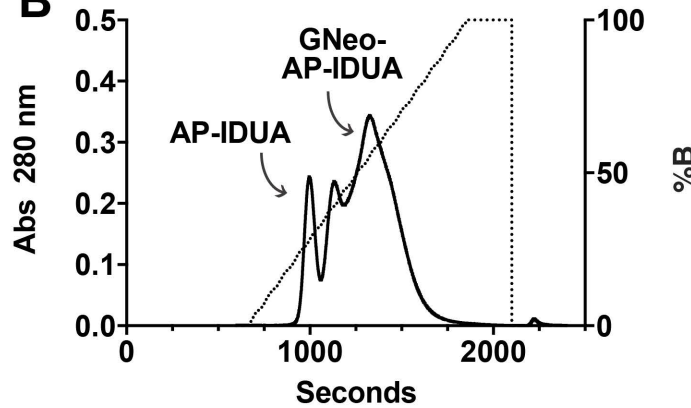**C**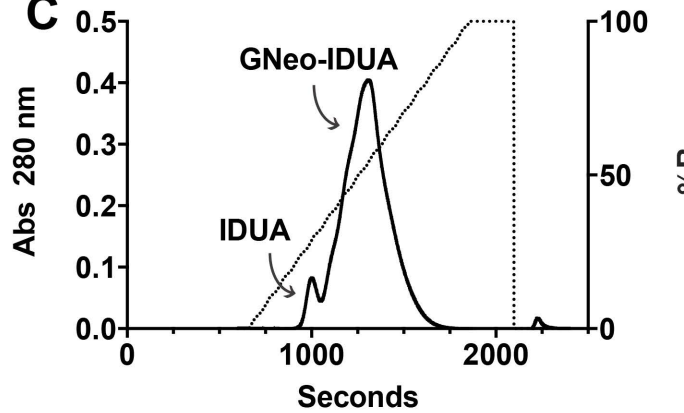**D**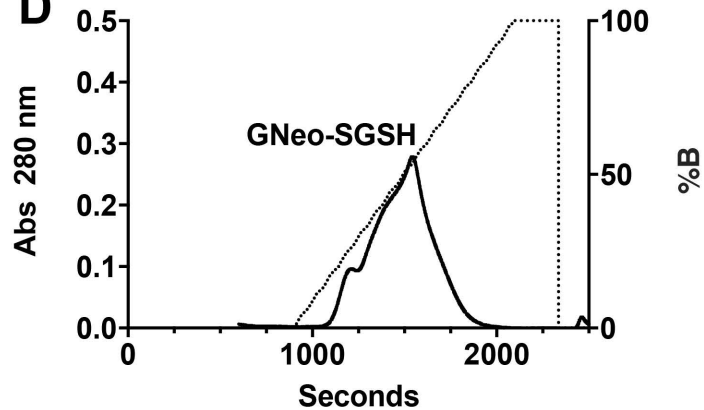

Fig. S1 Tong et al.

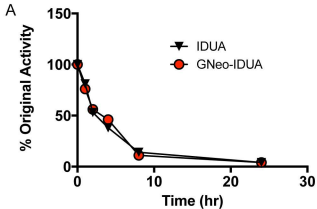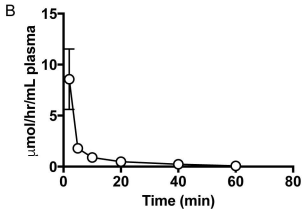

Fig. S2 Tong et al.

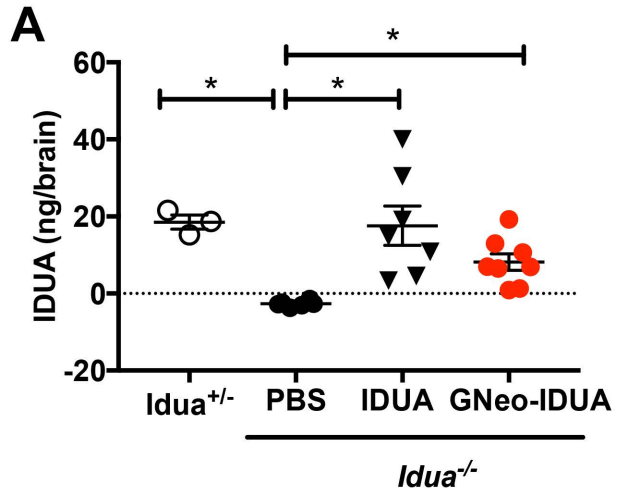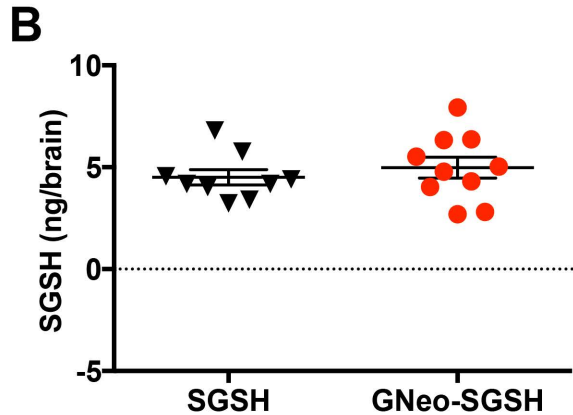

Fig. S3 Tong et al.

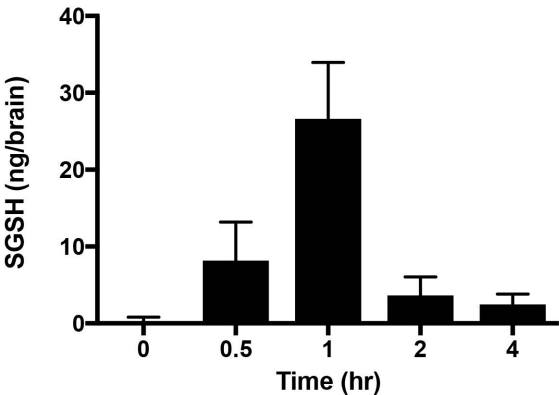

Fig. S4 Tong et al.

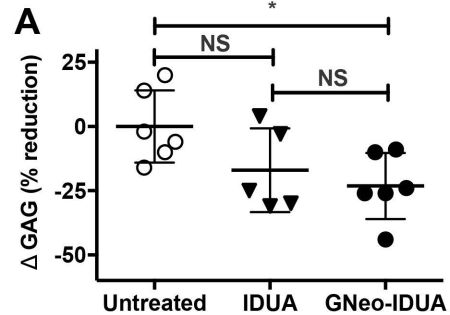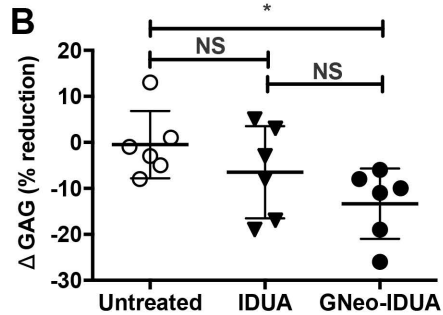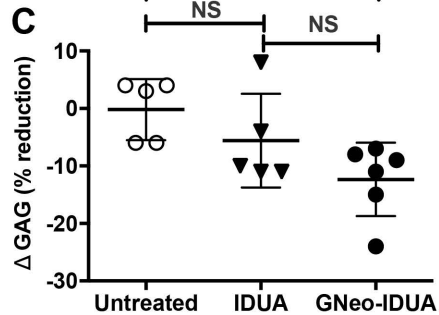

Fig. S5 Tong et al.

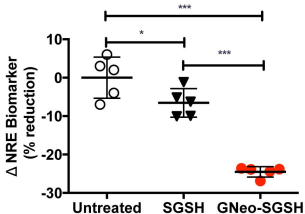

Fig. S6 Tong et al.
